# Supplementary material for: PP2A in LepR+ mesenchymal stem cells contributes to embryonic and postnatal endochondral ossification through Runx2 dephosphorylation
Source: PubMed Central journal article supplement (PMC8172534; doi:10.1038/s42003-021-02175-1), 2021-06-02
Supplement: 42003_2021_2175_MOESM2_ESM.pdf [file 42003_2021_2175_MOESM2_ESM.pdf]

## **Description of Additional Supplementary Files**

**File name:** Supplementary Data 1

**Description:** Source data behind the graphs in the paper.
